# Supplementary material
Source: PubMed Central journal article supplement (PMC1201599)

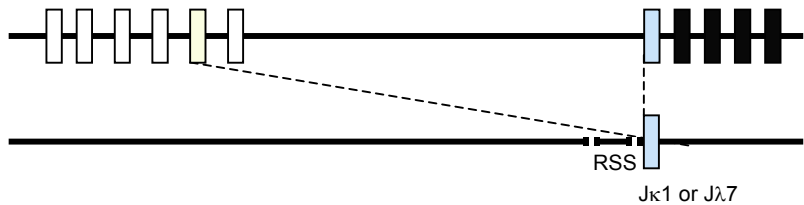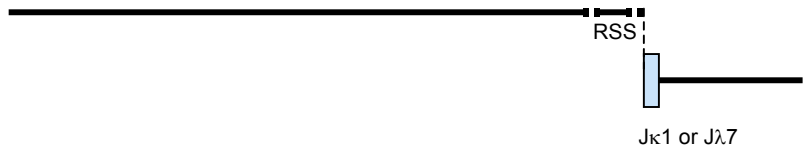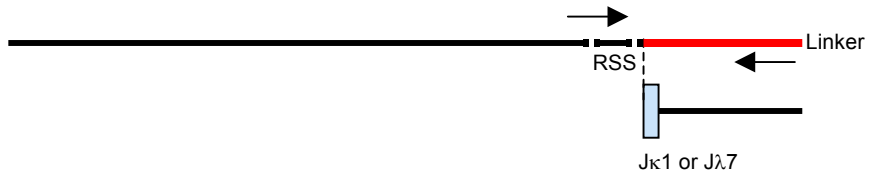

Supplement: pnas_0505196102_1.pdf [file pnas_0505196102_1.pdf]
